# Supplementary material for: Facultative heterochromatin formation in rDNA is essential for cell survival during nutritional starvation
Source: PubMed Central journal article supplement (PMC9023297; doi:10.1093/nar/gkac175), 2022-03-28
Supplement: gkac175_supplemental_file.pdf [file gkac175_supplemental_file.pdf]

## **Supplemental information**

### **Facultative heterochromatin formation in rDNA is essential for cell survival during nutritional starvation**

Hayato Hirai, Naomichi Takemata, Miki Tamura and Kunihiro Ohta

Supplementary Figure S1-S5

Supplementary Table S1-S5

# Supplementary Figure S1

**A**

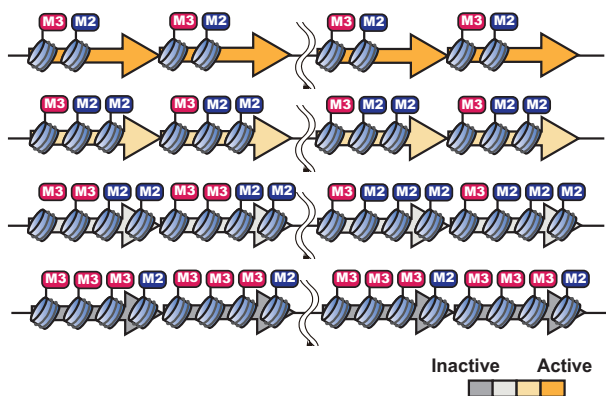

**B**

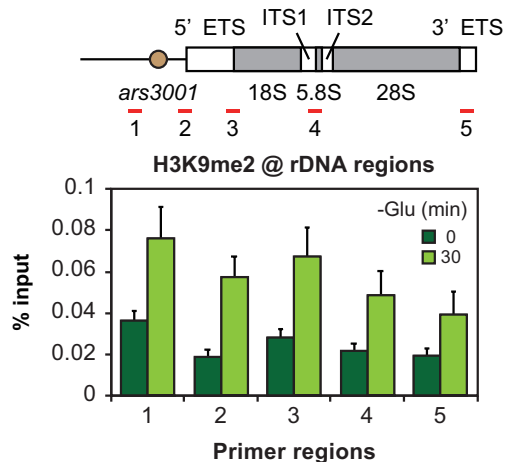

**C**

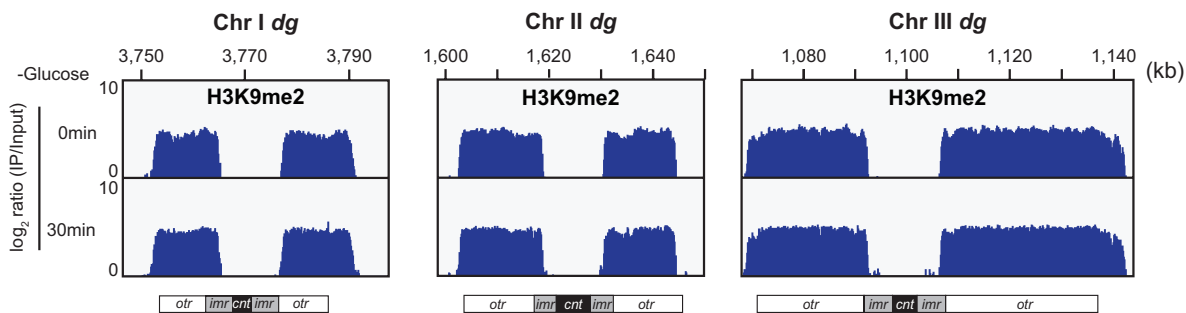

**D**

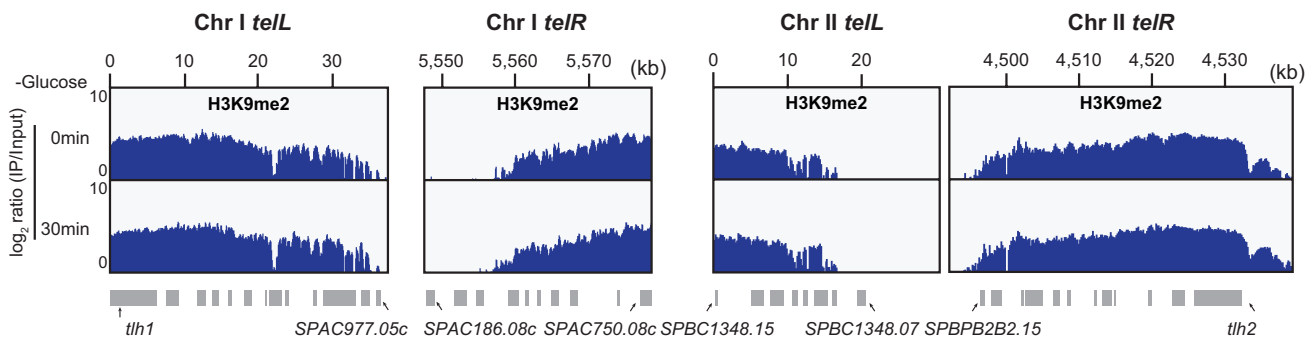

**E**

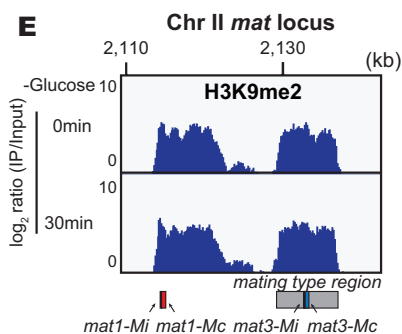

**F**

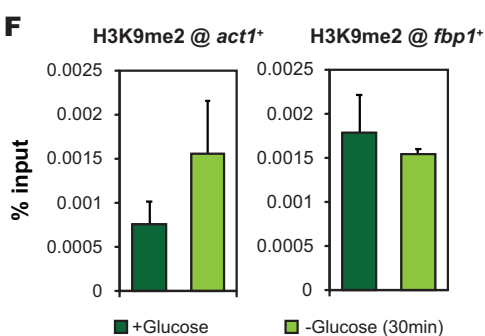

**G**

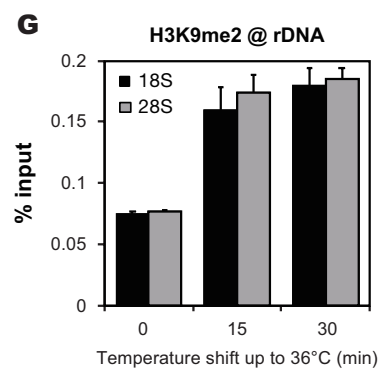

### Supplementary Figure S1. Related to Figure 1.

(A) A schematic diagram showing the induction of H3K9 methylation in rDNA by glucose starvation. Methylated H3 may accumulate in specific regions in rDNA repeats even under nutritious conditions. In response to glucose starvation, histone H3 is incorporated into rDNA repeats and simultaneously dimethylated. Then, dimethylation is converted to trimethylation to enhance the heterochromatin state.

(B) (top) A schematic diagram of the rDNA region with primer sets 1-5 (red lines) for ChIP-qPCR. (bottom) Analysis of the H3K9me2 levels in each region. -Glu indicates 0 or 30 min after glucose starvation (mean + SEM: n = 3).

(C-E) ChIP-seq data showing H3K9me2 enrichment at pericentromeres on chromosome I, II and III (C), and at sub-telomeres on chromosome I and II (D), and at mating type locus on chromosome II (E) during glucose-rich (0min, upper) and glucose-poor (30min, bottom) conditions. The y-axis exhibits log<sub>2</sub> ratio of IP/input (0-10). Under panels, cnt: central core, imr: inner repeat region, otr: outer repeat region. Grey boxes indicate genes.

(F) ChIP-qPCR showing H3K9me2 levels in euchromatin regions (the *act1*<sup>+</sup> coding sequence and the upstream of *fbp1*<sup>+</sup>). Glucose starvation was induced for 30 min (mean + SEM: n = 3).

(G) ChIP-qPCR showing the levels of H3K9me2 in 18S and 28S rDNA (mean + SEM: n = 3). Cells were harvested 0, 15, and 30 min after temperature shift up to 36°C.

Supplementary Figure S2

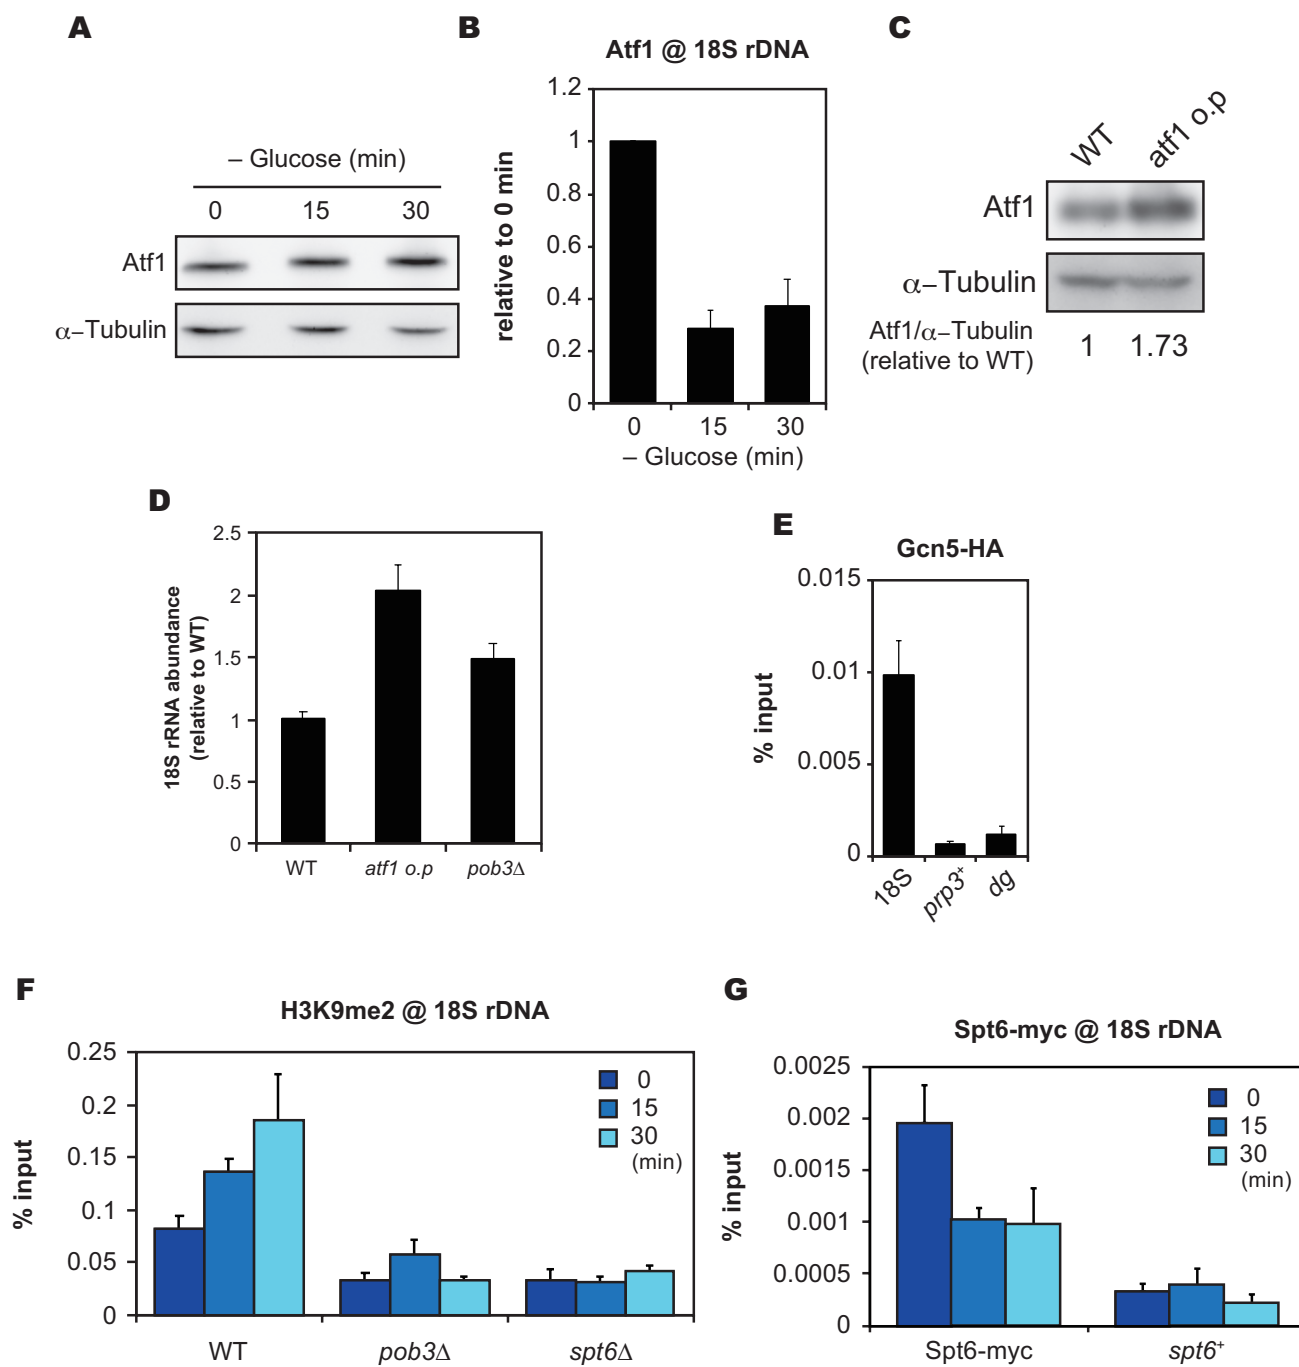

### Supplementary Figure S2. Related to Figure 2.

(A) The amount of bulk Atf1 in cell extracts is unchanged by glucose starvation. Immunoblotting was performed with anti-Atf1 and anti- $\alpha$ -Tubulin antibodies. (B) Atf1 binding to 18S rDNA in the *spc1 $\Delta$*  strain. Atf1 dissociated from rDNA after glucose starvation like in the wild type. Values relative to that at 0 min after glucose starvation are indicated (mean + SEM: n = 3). (C) Immunoblotting examining the amount of Atf1 and  $\alpha$ -Tubulin (top). Signal intensity ratio of Atf1/ $\alpha$ -Tubulin in the wild type (WT) and *atf1 o.p* strain (bottom). Signal intensity of bands was measured by ImageJ. (D) 18S rRNA abundance relative to the wild type expression level (WT) under glucose-rich conditions in *atf1 o.p* and *pob3 $\Delta$*  strains (mean+ SD: n = 3). (E) ChIP-qPCR showing Gcn5-HA enrichment in 18S rDNA, *prp3<sup>+</sup>* and *dg* (peri-centromeres) regions (mean + SEM: n = 3). The data for 18S rDNA is the same as in Figure 2I. (F) H3K9me2 levels in 18S rDNA in the wild type, *pob3 $\Delta$*  and *spt6 $\Delta$*  (mean + SEM: n = 3). The data for the wild type is identical to that in Figure 2C. (G) ChIP-qPCR quantifying Spt6-myc occupancy in 18S rDNA during glucose starvation. Control experiments were conducted using an untagged strain (*spt6<sup>+</sup>*) (mean + SEM: n = 3).

**Supplementary Figure S3**

**A**

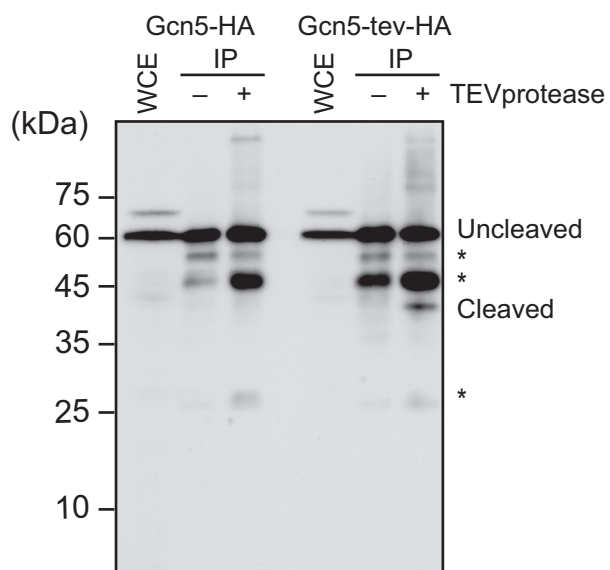

**C**

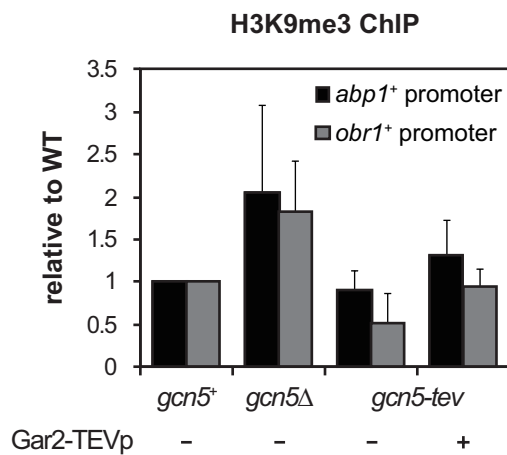

**B**

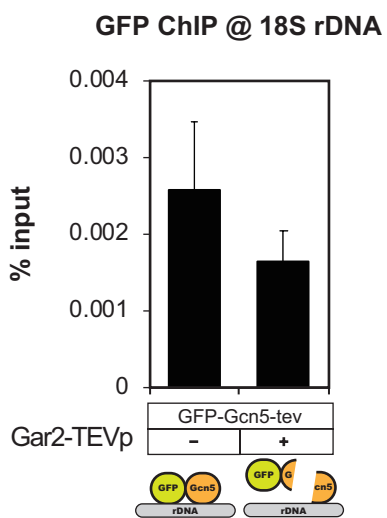

**Supplementary Figure S3. Related to Figure 4.**

(A) Immunoblotting showing the cleaved Gcn5-tev-HA. Immunoprecipitated Gcn5-HA and Gcn5-tev-HA were incubated with (+) or without (-) TEV protease at 30°C overnight. The full-length Gcn5-tev-HA (Uncleaved) and the cleaved products (Cleaved) were detected. Asterisks indicate non-specific bands. (B) ChIP-qPCR showing the amount of GFP-Gcn5-tev in 18S rDNA when Gar2-TEV protease is co-expressed (+) or not (-) (mean + SEM: n = 12). (C) ChIP-qPCR showing H3K9me3 levels at the *abp1*<sup>+</sup> and *obr1*<sup>+</sup> promoters in the wild type, *gcn5*Δ, *gcn5-tev-HA* and *gcn5-tev-HA gar2-TEVp* strains (mean + SEM: n = 3). Expression of *abp1*<sup>+</sup> and *obr1*<sup>+</sup> genes is known to be activated by Gcn5.

Supplementary Figure S4

**A**

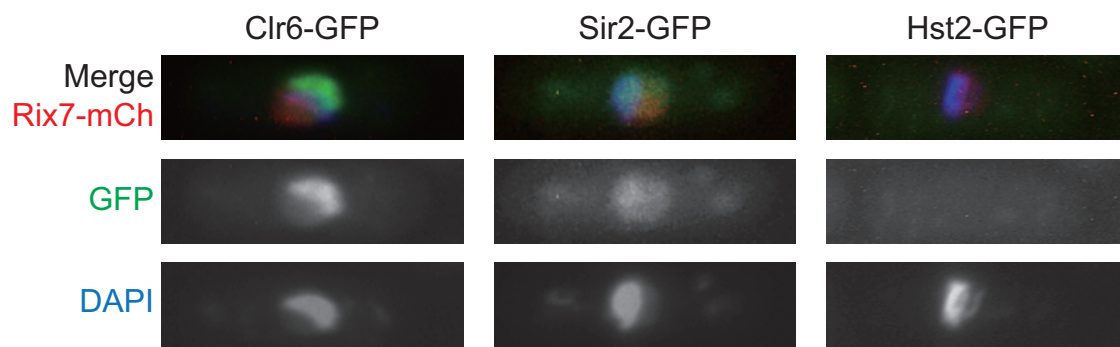

**B**

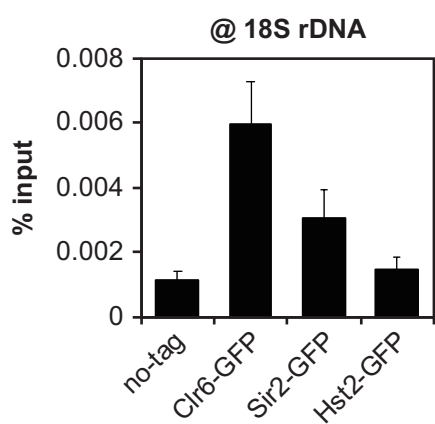

**C**

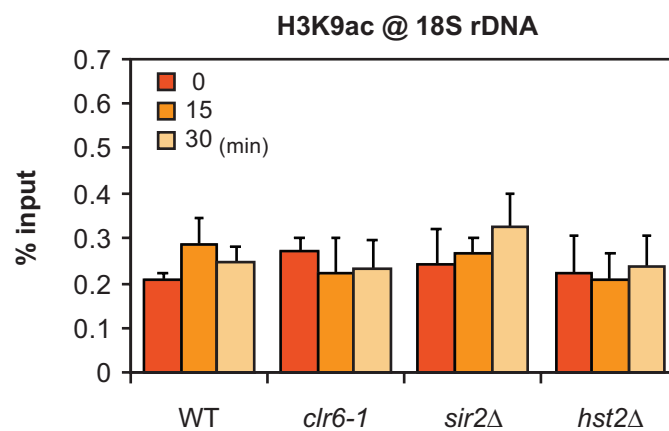

**D**

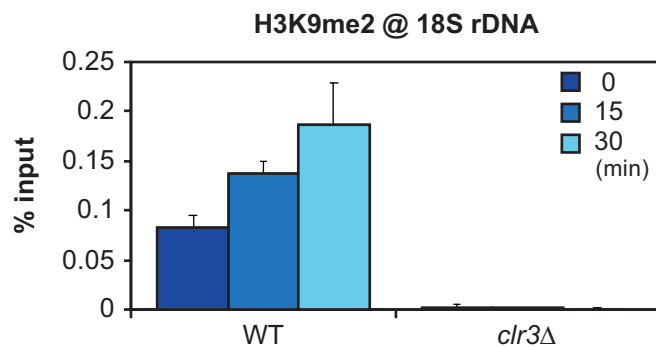



**Supplementary Figure S4. Roles of HDACs in the rDNA heterochromatinization.**

(A) Localization of Clr6-GFP, Sir2-GFP and Hst2-GFP (green). Nucleoli and DNA were visualized with Rix7-mCherry (red) and DAPI (blue), respectively. Scale bar = 5  $\mu$ m. (B) CHIP-qPCR data showing enrichment of Clr6-GFP (n = 3), Sir2-GFP (n = 5) and Hst2-GFP (n = 3) in 18S rDNA. No-tag indicates the wild type without GFP expression (WT, n = 4), (mean + SEM). (C) H3K9ac levels in 18S rDNA in the wild type (WT), *clr6-1*, *sir2 $\Delta$*  and *hst2 $\Delta$*  mutants during glucose starvation (mean + SEM: n = 3). (D) H3K9me2 levels in 18S rDNA were drastically reduced in the *clr3 $\Delta$*  mutant (mean + SEM: n = 3). The data for the wild type (WT) is identical to that in Figure 2C.

Supplementary Figure S5

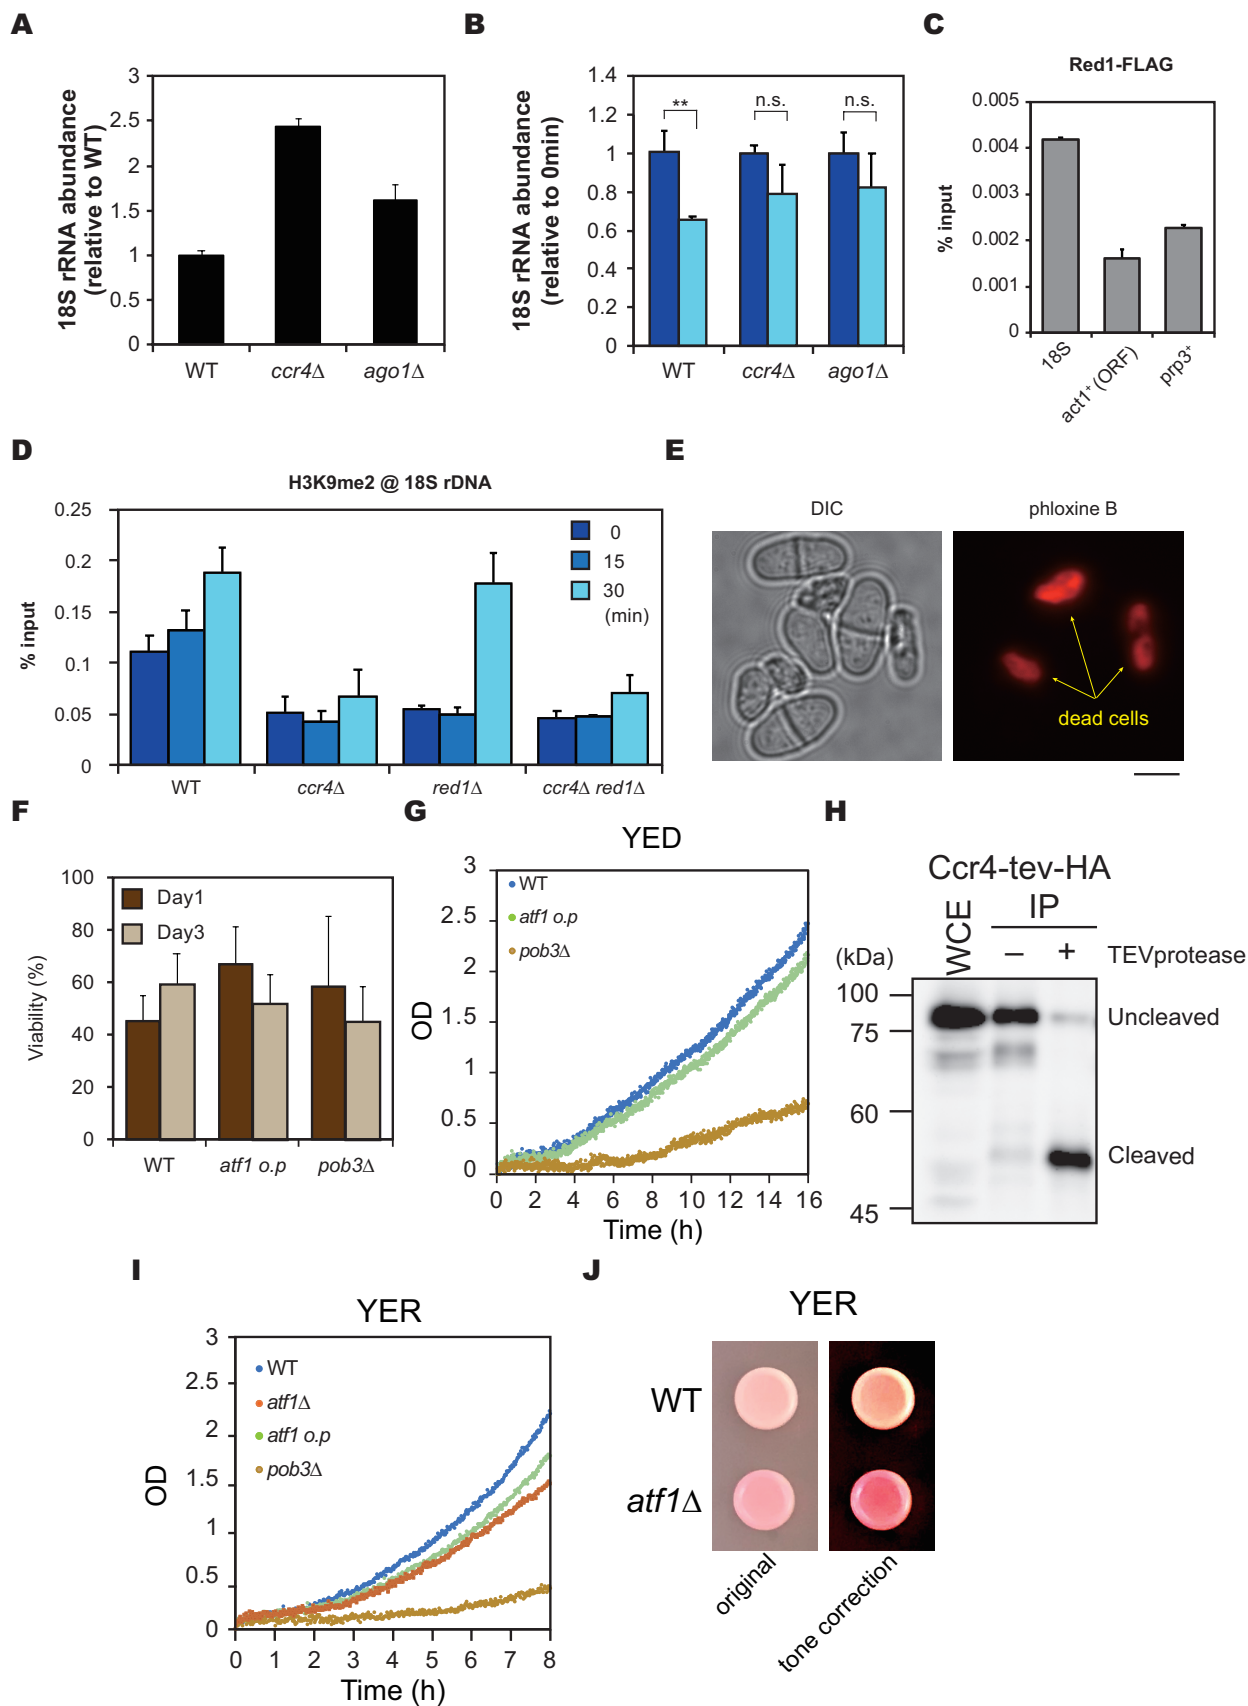

### Supplementary Figure S5. Related to Figure 5.

(A) 18S rRNA abundance relative to the wild type expression level (WT) under glucose-rich conditions in *ccr4* $\Delta$  and *ago1* $\Delta$  mutants (mean + SD: n = 3). The wild type control data is the same as in Supplementary Figure S2D. (B) 18S rRNA abundance in the wild type (WT), *ccr4* $\Delta$  and *ago1* $\Delta$  mutants (mean + SD: n = 3) relative to those at 0 min. Student's *t*-test (two-tailed) was applied and statistical significance was indicated (\*\**p*<0.01, n.s., not significant). The wild type control data is the same as in Figure 2G. (C) ChIP-qPCR to quantify Red1-FLAG occupancy in 18S rDNA, *prp3*<sup>+</sup> and the coding region of *act1*<sup>+</sup> (mean + SEM: n = 5). (D) ChIP-qPCR results showing H3K9 methylation levels in 18S rDNA in the wild type (WT, n = 4), *ccr4* $\Delta$  (n = 3), *red1* $\Delta$  (n = 3) and *ccr4* $\Delta$  *red1* $\Delta$  (n = 3) mutants (mean + SEM). Time indicates minutes from glucose depletion. The data for the wild type is identical to that in Figure 5A. (E) Microscopic observation showing dead cells in the glucose-starved medium stained with Phloxine B. Dead cells (yellow arrows) are detected at 530 nm wavelength. (F) Viability data during glucose starvation in the wild type (WT, n = 3), *atf1 o.p* (n = 4) and *pob3* $\Delta$  (n = 4) strains (mean + SD). The data for the wild type is identical to that in Figure 5F. (G) Monitoring of cell density (OD) per minute in the wild type (WT), *atf1 o.p*, and *pob3* $\Delta$  strains. Times after glucose depletion are indicated. (H) Immunoblotting showing cleaved Ccr4-tev-HA. Immunoprecipitated Ccr4-tev-HA was incubated with (+) or without (-) TEV protease at 30°C overnight. The band of full-length Ccr4-tev-HA (Uncleaved) disappeared and the cleaved product (Cleaved) was detected when TEV protease was added. (I) Monitoring of cell density (OD) per minute in the wild type (WT), *atf1* $\Delta$ , *atf1* overexpressed (*atf1 o.p*) and *pob3* $\Delta$  cells. Cells were grown in a glucose-rich medium (YER) and culturing time is indicated. (J) Spot assay. 10<sup>6</sup> cells were spotted on the glucose-rich YER agar plate containing phloxine B. Cells lacking *atf1*<sup>+</sup> exhibited a red-colored spot more frequently than the wild type (WT) cells. Original and tone-corrected images are shown.

### Supplementary Table S1. List of strains used in this study

| Strain name | Genotype                                                        | Figures                                                                                                    |
|-------------|-----------------------------------------------------------------|------------------------------------------------------------------------------------------------------------|
| L975        | <i>h<sup>+</sup></i>                                            | 1A-F, K, 2B, D, F, G, 3E, 4A, C, 5A, C-F, H, J, S1B, F, G, S2A, C, D, G, S3C, S4B-D, S5A, B, D, F, G, I, J |
| HH187       | <i>h<sup>+</sup> pob3-FLAG-kan</i>                              | 1G, S1C-E                                                                                                  |
| HH42        | <i>mat1M-Smt0 GFP-swi6-kan</i>                                  | 1H, I                                                                                                      |
| HH161       | <i>h<sup>+</sup> nuc1-FLAG-kan</i>                              | 1J, 5B                                                                                                     |
| HH21        | <i>h<sup>+</sup> gcn5-3HA-kan</i>                               | 2C, E, H, I, S2E, F                                                                                        |
| HH51        | <i>h<sup>+</sup> gcn5-3HA-kan atf1::ura4+ ura4-D18</i>          | 2C, I                                                                                                      |
| HH104       | <i>h<sup>+</sup> Z::adh21-atf1-nat</i>                          | 2D, E, G, S2C, D, S5F, G, I                                                                                |
| HH18        | <i>h<sup>+</sup> atf1::ura4+ ura4-D18</i>                       | 2F, 3E, S5I, J                                                                                             |
| HH153       | <i>h<sup>+</sup> pob3::kan</i>                                  | 2G, S2D, F, S5F, G, S5I                                                                                    |
| HH84        | <i>h<sup>+</sup> pob3-GFP-kan</i>                               | 2J                                                                                                         |
| HH92        | <i>h<sup>+</sup> pob3-GFP-kan atf1::hph</i>                     | 2J                                                                                                         |
| HH276       | <i>h<sup>+</sup> pob3-GFP-kan Z::adh21-atf1-nat</i>             | 2J                                                                                                         |
| HH26        | <i>h<sup>+</sup> gcn5::ura4+ ura4-D18</i>                       | 4A, S3C                                                                                                    |
| HH95        | <i>h<sup>+</sup> gcn5-tev(148)-3HA-hph</i>                      | 4C-E, S3A, S3C                                                                                             |
| HH99        | <i>h<sup>+</sup> gcn5-3HA-hph</i>                               | 4C, S3A                                                                                                    |
| HH100       | <i>h<sup>+</sup> gar2-TEVprotease-kan gcn5-tev(148)-3HA-hph</i> | 4C-E, S3C                                                                                                  |
| HH106       | <i>h<sup>+</sup> gar2-TEVprotease-kan gcn5-3HA-hph</i>          | 4C-E                                                                                                       |
| HH73        | <i>h<sup>+</sup> ago1::hph</i>                                  | 5A, F, S5A, B                                                                                              |
| HH80        | <i>h<sup>+</sup> ccr4::kan</i>                                  | 5A, S5A, B                                                                                                 |
| HH93        | <i>h<sup>+</sup> ccr4::kan ago1::hph</i>                        | 5A                                                                                                         |
| HH163       | <i>h<sup>+</sup> nuc1-FLAG-kan ccr4::hph</i>                    | 5B                                                                                                         |
| HH199       | <i>h<sup>+</sup> nuc1-632-FLAG-kan ccr4::hph</i>                | 5B                                                                                                         |
| HH224       | <i>h<sup>+</sup> nuc1-FLAG-kan ago1::hph</i>                    | 5B                                                                                                         |
| NT322       | <i>mat1M-Smt0 ccr4::hph</i>                                     | 5C-F, J, S5D, E                                                                                            |
| NT287       | <i>h<sup>+</sup> clr4::kan</i>                                  | 5F                                                                                                         |
| HH167       | <i>h<sup>+</sup> nuc1-632 ago1::hph</i>                         | 5G                                                                                                         |
| HH172       | <i>h<sup>+</sup> nuc1-632</i>                                   | 5G                                                                                                         |
| HH175       | <i>h<sup>+</sup> nuc1-632 ccr4::hph</i>                         | 5G                                                                                                         |
| HH181       | <i>h<sup>+</sup> nuc1-632 clr4::kan</i>                         | 5G                                                                                                         |
| HH272       | <i>h<sup>+</sup> ccr4-tev(300)-3HA-hph</i>                      | 5H-J, S5H                                                                                                  |
| HH285       | <i>h<sup>+</sup> gar2-TEVprotease-kan ccr4-tev(300)-3HA-hph</i> | 5H-J                                                                                                       |
| HH81        | <i>h<sup>+</sup> spc1::ura4+ ura4-D18</i>                       | S2B                                                                                                        |
| HH137       | <i>h<sup>+</sup> spt6::ura4+ ura4-D18</i>                       | S2F                                                                                                        |
| HH140       | <i>h<sup>+</sup> spt6-13myc-hph</i>                             | S2G                                                                                                        |

| Strain name | Genotype                                                                      | Figures |
|-------------|-------------------------------------------------------------------------------|---------|
| HH165       | <i>h<sup>+</sup> GFP-gcn5-tev(148)-3HA-hph</i>                                | S3B     |
| HH173       | <i>h<sup>+</sup> gar2-TEVprotease-kan</i><br><i>GFP-gcn5-tev(148)-3HA-hph</i> | S3B     |
| HH1090      | <i>h<sup>-</sup> clr6-GFP-kan leu1-32 ura4-D18 ade6-M216</i>                  | S4A, B  |
| HH1140      | <i>h<sup>-</sup> sir2-GFP-kan leu1-32 ura4-D18 ade6-M216</i>                  | S4A, B  |
| HH1142      | <i>h<sup>-</sup> hst2-GFP-kan leu1-32 ura4-D18 ade6-M216</i>                  | S4A, B  |
| HH52        | <i>h<sup>-</sup> clr6-1</i>                                                   | S4C     |
| HH57        | <i>h<sup>-</sup> hst2::ura4+ ura4-D18</i>                                     | S4C     |
| HH59        | <i>h<sup>-</sup> sir2::ura4+ ura4-D18</i>                                     | S4C     |
| HH260       | <i>h<sup>+</sup> clr3::kan</i>                                                | S4C     |
| NT347       | <i>mat1M-Smt0 red1-FLAG-kan 12myc-clr4</i>                                    | S5C     |
| HH127       | <i>h<sup>+</sup> red1::kan</i>                                                | S5D     |
| HH129       | <i>mat1M-Smt0 red1::kan ccr4::hph</i>                                         | S5D     |

HH1090, HH1140, and HH1142 were distributed from M. Sato. FY21276 and FY21289 strains were provided from NBRP (originated from M. Yanagida), from which HH167, HH172, HH175, HH181, and 199 were created. HH52 was generated from HH1444 distributed by M. Sato.

## Supplementary Table S2. List of primers used in this study

| Number | Name              | Sequence                      | Figures                                                                           |
|--------|-------------------|-------------------------------|-----------------------------------------------------------------------------------|
| NT2    | fbp1-UAS1_S_-1223 | CTCCTCCTACTAACTACTCCATCC      | 1E, F, S1F                                                                        |
| NT4    | fbp1-UAS1_A_-1142 | TGATGAGTACTAATGCTTTGTGACG     | 1E, F, S1F                                                                        |
| NT23   | act1-ORF_F        | CTCTGGTGATGGTGTACCCACACTG     | 1E, F, S1F, S5C                                                                   |
| NT24   | act1-ORF_R        | AAGTCACGACCGGCGAGATCAAG       | 1E, F, S1F, S5C                                                                   |
| NT83   | prp3_F            | GCACAGTCGTTGTACAAATTCGTATTCCC | S2E, S5C                                                                          |
| NT84   | prp3_R            | ACGATTCTAAACGCCTCTTGTACGATCC  | S2E, S5C                                                                          |
| NT123  | cen-dg_F          | AATTGTGGTGGTGTGGTAATAC        | 1H, I, 5I, S2E                                                                    |
| NT124  | cen-dg_R          | GGGTTTCATCGTTTCCATTGAG        | 1H, I, 5I, S2E                                                                    |
| NT125  | mei4_F            | CTTTCTTTACAAAAACATCGCGAAC     | 5I                                                                                |
| NT126  | mei4_R            | TGTTAAATCAGGGACATAAAGAAGTGAC  | 5I                                                                                |
| NT169  | act1_RT-_F        | TACCCCATGAGCACGGTAT           | 1K, 2F, G, 3E, 5B, S2D,<br>S5A                                                    |
| NT170  | act1_RT_R         | CTTCTCACGGTTGGATTTGG          | 1K, 2F, G, 3E, 5B, S2D,<br>S5A                                                    |
| NT278  | rDNA_N1_F         | AGAAAAAGTCGAGCGAGTCG          | S1B                                                                               |
| NT279  | rDNA_N1_R         | TCTTCAAAAGTGCATTACCCTTAC      | S1B                                                                               |
| NT282  | rDNA_N4_F         | CACCGAAATGGACGAAATTCAC        | S1B                                                                               |
| NT283  | rDNA_N4_R         | CCTTGGACCTATTTTTCTCGA         | S1B                                                                               |
| NT284  | rDNA_18S-1_F      | CGATAGTTACCTGGTTGATCCTG       | S1B                                                                               |
| NT285  | rDNA_18S-1_R      | TGAGCCATTTCGAGTTTCAC          | S1B                                                                               |
| NT286  | rDNA_18S-2_F      | TCGGCACCTTACGAGAAATC          | 1A-C, E, F, H-K, 2B-J, 4A,<br>D, E, 5A, B, I, S1G, S2B,<br>D-G, S3B, S4B-D, S5A-D |
| NT287  | rDNA_18S-2_R      | TATGTCTGGACCTGGTGAGT          | 1A-C, E, F, H-K, 2B-J, 4A,<br>D, E, 5A, B, I, S1G, S2B,<br>D-G, S3B, S4B-D, S5A-D |
| NT288  | rDNA_5.8S_F       | CAACGGATCTCTTGGCTCTC          | 1J, S1B                                                                           |
| NT289  | rDNA_5.8S_R       | CGATGATTCACGGAATTCTGCA        | 1J, S1B                                                                           |
| NT290  | rDNA_28S-1_F      | GAGACCGATAGCGAACAAAGTAG       | 1A-C, J, 2H, S1G                                                                  |
| NT291  | rDNA_28S-1_R      | TGACCTACCACAGGTTTCAGAG        | 1A-C, J, 2H, S1G                                                                  |
| NT307  | rDNA_N3_F         | TGAAGCGGGTGTAAAGATGAG         | S1B                                                                               |
| NT308  | rDNA_N3_R         | GAATGACTGTTTTTGCATTCCAG       | S1B                                                                               |
| NT330  | mcp5_F            | ATGAAACCGACAGAGATGATGAG       | 5I                                                                                |
| NT331  | mcp5_R            | CAGAGAAAGTGGGTACAAGCAAG       | 5I                                                                                |
|        | abp1_Prom_Fw      | CATTCTACCTGCCTTCATTTG         | S3C                                                                               |

| Number | Name         | Sequence              | Figures |
|--------|--------------|-----------------------|---------|
|        | abp1_Prom_Rv | ACAACAATGGAATGCTGGCC  | S3C     |
|        | obr1_Prom_Fw | CAGTGCTGACCAATTCCTTGC | S3C     |
|        | obr1_Prom_Rv | TTTATCGATGTAGCTGCGCC  | S3C     |
|        | rpl102-Fw    | AATGTCCCCCGTCCTAACAT  | 3E      |
|        | rpl102-Rv    | CAACAAACGAGGGATTTGCT  | 3E      |
|        | rlp7-Fw      | CTACCGCCAACGAGAAAGAG  | 3E      |
|        | rpl7-Rv      | AAGGCGTAATAAGCGCAGAA  | 3E      |
|        | gar2-Fw      | CCGAATCCAGCTCTGAAGAC  | 3E      |
|        | gar2-Rv      | CGTGCACCAACAATTGTACC  | 3E      |

The NT2 and NT4 paired primers are the same sequence as those used in (1).

The NT83 and NT84 paired primers are the same sequence as those used in (2).

The NT123-NT124 and NT125-126 paired primers are the same sequence as those used in (3).

The NT169 and NT170 paired primers are the same sequence as those used in (4).

### Supplementary Table S3. Genes where Atf1 binding was reduced

| No. | Systematic ID | No. | Systematic ID | No. | Systematic ID | No. | Systematic ID |
|-----|---------------|-----|---------------|-----|---------------|-----|---------------|
| 1   | SPAC1006.09   | 26  | SPAC13G6.02c  | 51  | SPAC19B12.04  | 76  | SPAC23H3.13c  |
| 2   | SPAC1039.02   | 27  | SPAC13G6.06c  | 52  | SPAC19B12.05c | 77  | SPAC23H4.06   |
| 3   | SPAC1071.06   | 28  | SPAC13G6.07c  | 53  | SPAC19G12.05  | 78  | SPAC23H4.07c  |
| 4   | SPAC1071.07c  | 29  | SPAC140.02    | 54  | SPAC1B3.05    | 79  | SPAC24C9.11   |
| 5   | SPAC1071.09c  | 30  | SPAC144.11    | 55  | SPAC1F12.02c  | 80  | SPAC24C9.12c  |
| 6   | SPAC1071.10c  | 31  | SPAC144.12    | 56  | SPAC1F7.13c   | 81  | SPAC24H6.07   |
| 7   | SPAC10F6.01c  | 32  | SPAC15E1.03   | 57  | SPAC1F8.06    | 82  | SPAC25B8.13c  |
| 8   | SPAC10F6.02c  | 33  | SPAC16.04     | 58  | SPAC1F8.07c   | 83  | SPAC25G10.06  |
| 9   | SPAC110.01    | 34  | SPAC16.05c    | 59  | SPAC1F8.08    | 84  | SPAC25G10.07c |
| 10  | SPAC110.03    | 35  | SPAC1687.05   | 60  | SPAC222.09    | 85  | SPAC26A3.04   |
| 11  | SPAC110.04c   | 36  | SPAC1687.06c  | 61  | SPAC222.11    | 86  | SPAC26A3.07c  |
| 12  | SPAC11E3.12   | 37  | SPAC1705.03c  | 62  | SPAC227.16c   | 87  | SPAC26A3.17c  |
| 13  | SPAC11E3.13c  | 38  | SPAC17A2.11   | 63  | SPAC22A12.14c | 88  | SPAC26F1.06   |
| 14  | SPAC11E3.15   | 39  | SPAC17A2.12   | 64  | SPAC22A12.15c | 89  | SPAC26F1.14c  |
| 15  | SPAC11G7.04   | 40  | SPAC17A5.03   | 65  | SPAC22G7.06c  | 90  | SPAC29A4.02c  |
| 16  | SPAC11G7.05c  | 41  | SPAC17A5.04c  | 66  | SPAC22H12.03  | 91  | SPAC29B12.08  |
| 17  | SPAC1250.05   | 42  | SPAC17D4.01   | 67  | SPAC22H12.04c | 92  | SPAC2C4.16c   |
| 18  | SPAC12G12.04  | 43  | SPAC17D4.02   | 68  | SPAC23A1.07   | 93  | SPAC2E1P3.04  |
| 19  | SPAC12G12.05c | 44  | SPAC1805.10   | 69  | SPAC23A1.08c  | 94  | SPAC2E1P3.05c |
| 20  | SPAC1399.06   | 45  | SPAC1805.11c  | 70  | SPAC23A1.10   | 95  | SPAC2F3.09    |
| 21  | SPAC13C5.05c  | 46  | SPAC1805.13   | 71  | SPAC23A1.11   | 96  | SPAC2F3.16    |
| 22  | SPAC13C5.07   | 47  | SPAC1805.14   | 72  | SPAC23A1.12c  | 97  | SPAC30D11.11  |
| 23  | SPAC13D6.01   | 48  | SPAC1834.13   | 73  | SPAC23D3.12   | 98  | SPAC31G5.03   |
| 24  | SPAC13D6.02c  | 49  | SPAC18G6.14c  | 74  | SPAC23H3.08c  | 99  | SPAC31G5.11   |
| 25  | SPAC13G6.01c  | 50  | SPAC19B12.02c | 75  | SPAC23H3.09c  | 100 | SPAC31G5.17c  |



| No. | Systematic ID | No. | Systematic ID | No. | Systematic ID | No. | Systematic ID  |
|-----|---------------|-----|---------------|-----|---------------|-----|----------------|
| 101 | SPAC328.10c   | 126 | SPAC4H3.10c   | 151 | SPAC890.08    | 176 | SPAPB17E12.13  |
| 102 | SPAC3A12.10   | 127 | SPAC513.01c   | 152 | SPAC8C9.08    | 177 | SPAPB17E12.14c |
| 103 | SPAC3A12.11c  | 128 | SPAC521.05    | 153 | SPAC8C9.09c   | 178 | SPAPB18E9.05c  |
| 104 | SPAC3F10.17   | 129 | SPAC57A10.11c | 154 | SPAC8E11.10   | 179 | SPAPB2B4.01c   |
| 105 | SPAC3F10.18c  | 130 | SPAC57A10.12c | 155 | SPAC8F11.10c  | 180 | SPAPB8E5.05    |
| 106 | SPAC3G6.05    | 131 | SPAC589.09    | 156 | SPAC9.09      | 181 | SPAPB8E5.06c   |
| 107 | SPAC3G6.11    | 132 | SPAC589.10c   | 157 | SPAC9.10      | 182 | SPAPJ698.02c   |
| 108 | SPAC3G9.03    | 133 | SPAC5D6.01    | 158 | SPAC926.03    | 183 | SPBC106.18     |
| 109 | SPAC3H1.07    | 134 | SPAC5D6.02c   | 159 | SPAC926.04c   | 184 | SPBC1105.01    |
| 110 | SPAC3H1.08c   | 135 | SPAC644.15    | 160 | SPAC959.05c   | 185 | SPBC1105.02c   |
| 111 | SPAC3H5.04    | 136 | SPAC644.17c   | 161 | SPAC959.07    | 186 | SPBC1105.05    |
| 112 | SPAC3H5.05c   | 137 | SPAC664.03    | 162 | SPAC959.08    | 187 | SPBC11C11.08   |
| 113 | SPAC3H5.07    | 138 | SPAC664.05    | 163 | SPAC959.09c   | 188 | SPBC11C11.09c  |
| 114 | SPAC3H5.10    | 139 | SPAC664.06    | 164 | SPAC977.16c   | 189 | SPBC1271.09    |
| 115 | SPAC3H5.11    | 140 | SPAC664.07c   | 165 | SPAC977.17    | 190 | SPBC1289.03c   |
| 116 | SPAC3H5.12c   | 141 | SPAC694.04c   | 166 | SPAC9E9.13    | 191 | SPBC12C2.06    |
| 117 | SPAC4D7.08c   | 142 | SPAC694.05c   | 167 | SPAC9G1.02    | 192 | SPBC12C2.07c   |
| 118 | SPAC4D7.09    | 143 | SPAC6B12.15   | 168 | SPAC9G1.03c   | 193 | SPBC1347.10    |
| 119 | SPAC4D7.10c   | 144 | SPAC6F6.07c   | 169 | SPAP8A3.02c   | 194 | SPBC1347.13c   |
| 120 | SPAC4F10.18   | 145 | SPAC6G10.11c  | 170 | SPAP8A3.06    | 195 | SPBC13A2.03    |
| 121 | SPAC4F10.22   | 146 | SPAC6G9.08    | 171 | SPAP8A3.07c   | 196 | SPBC13A2.04c   |
| 122 | SPAC4G9.07    | 147 | SPAC6G9.09c   | 172 | SPAPB15E9.01c | 197 | SPBC14C8.01c   |
| 123 | SPAC4G9.08c   | 148 | SPAC7D4.06c   | 173 | SPAPB15E9.02c | 198 | SPBC14F5.05c   |
| 124 | SPAC4G9.15    | 149 | SPAC806.11    | 174 | SPAPB15E9.06  | 199 | SPBC15D4.05    |
| 125 | SPAC4G9.16c   | 150 | SPAC890.05    | 175 | SPAPB17E12.05 | 200 | SPBC1652.01    |

| No. | Systematic ID | No. | Systematic ID | No. | Systematic ID | No. | Systematic ID |
|-----|---------------|-----|---------------|-----|---------------|-----|---------------|
| 201 | SPBC1683.09c  | 226 | SPBC1861.01c  | 251 | SPBC21C3.13   | 276 | SPBC359.02    |
| 202 | SPBC1683.10c  | 227 | SPBC1861.02   | 252 | SPBC21C3.14c  | 277 | SPBC359.03c   |
| 203 | SPBC1685.01   | 228 | SPBC18E5.04   | 253 | SPBC23G7.12c  | 278 | SPBC365.03c   |
| 204 | SPBC1685.02c  | 229 | SPBC18E5.05c  | 254 | SPBC23G7.14   | 279 | SPBC3B8.02    |
| 205 | SPBC1685.09   | 230 | SPBC18E5.06   | 255 | SPBC25H2.05   | 280 | SPBC3B9.12    |
| 206 | SPBC1685.10   | 231 | SPBC18H10.11c | 256 | SPBC25H2.06c  | 281 | SPBC3B9.13c   |
| 207 | SPBC1685.11   | 232 | SPBC18H10.12c | 257 | SPBC25H2.07   | 282 | SPBC3D6.02    |
| 208 | SPBC16C6.11   | 233 | SPBC18H10.13  | 258 | SPBC25H2.08c  | 283 | SPBC3D6.04c   |
| 209 | SPBC16C6.12c  | 234 | SPBC18H10.14  | 259 | SPBC26H8.06   | 284 | SPBC3D6.15    |
| 210 | SPBC16E9.02c  | 235 | SPBC18H10.15  | 260 | SPBC26H8.16   | 285 | SPBC3H7.06c   |
| 211 | SPBC16E9.05   | 236 | SPBC1921.04c  | 261 | SPBC27.08c    | 286 | SPBC428.02c   |
| 212 | SPBC16E9.06c  | 237 | SPBC1921.05   | 262 | SPBC29A3.04   | 287 | SPBC428.11    |
| 213 | SPBC16G5.13   | 238 | SPBC19C2.07   | 263 | SPBC29A3.05   | 288 | SPBC4F6.04    |
| 214 | SPBC16G5.14c  | 239 | SPBC19F8.08   | 264 | SPBC29A3.13   | 289 | SPBC4F6.05c   |
| 215 | SPBC1709.05   | 240 | SPBC19G7.02   | 265 | SPBC29B5.03c  | 290 | SPBC4F6.15c   |
| 216 | SPBC1709.06   | 241 | SPBC19G7.03c  | 266 | SPBC2F12.04   | 291 | SPBC4F6.16c   |
| 217 | SPBC1711.06   | 242 | SPBC19G7.04   | 267 | SPBC2F12.05c  | 292 | SPBC56F2.02   |
| 218 | SPBC1711.14   | 243 | SPBC1D7.05    | 268 | SPBC2F12.14c  | 293 | SPBC56F2.12   |
| 219 | SPBC1711.15c  | 244 | SPBC211.02c   | 269 | SPBC30B4.04c  | 294 | SPBC577.02    |
| 220 | SPBC1734.12c  | 245 | SPBC216.02    | 270 | SPBC30D10.18c | 295 | SPBC577.03c   |
| 221 | SPBC17G9.07   | 246 | SPBC21B10.10  | 271 | SPBC317.01    | 296 | SPBC685.06    |
| 222 | SPBC17G9.08c  | 247 | SPBC21B10.11  | 272 | SPBC32H8.11   | 297 | SPBC685.07c   |
| 223 | SPBC17G9.10   | 248 | SPBC21C3.08c  | 273 | SPBC336.08    | 298 | SPBC713.08    |
| 224 | SPBC17G9.11c  | 249 | SPBC21C3.09c  | 274 | SPBC336.09c   | 299 | SPBC776.02c   |
| 225 | SPBC1815.01   | 250 | SPBC21C3.10c  | 275 | SPBC336.10c   | 300 | SPBC776.11    |

| No. | Systematic ID | No. | Systematic ID | No. | Systematic ID | No. | Systematic ID |
|-----|---------------|-----|---------------|-----|---------------|-----|---------------|
| 301 | SPBC776.12c   | 326 | SPBPB2B2.05   | 351 | SPCC1840.13   | 376 | SPCC622.18    |
| 302 | SPBC800.04c   | 327 | SPCC1183.07   | 352 | SPCC191.08    | 377 | SPCC622.19    |
| 303 | SPBC83.01     | 328 | SPCC1183.08c  | 353 | SPCC24B10.09  | 378 | SPCC663.04    |
| 304 | SPBC83.02c    | 329 | SPCC11E10.01  | 354 | SPCC24B10.10c | 379 | SPCC663.18    |
| 305 | SPBC839.05c   | 330 | SPCC1259.01c  | 355 | SPCC24B10.21  | 380 | SPCC74.05     |
| 306 | SPBC839.12    | 331 | SPCC1281.08   | 356 | SPCC285.14    | 381 | SPCC794.08    |
| 307 | SPBC839.13c   | 332 | SPCC1322.11   | 357 | SPCC285.15c   | 382 | SPCC794.09c   |
| 308 | SPBC839.20    | 333 | SPCC1322.12c  | 358 | SPCC31H12.04c | 383 | SPCC825.05c   |
| 309 | SPBC8D2.05c   | 334 | SPCC1393.03   | 359 | SPCC330.13    | 384 | SPCC970.05    |
| 310 | SPBC8D2.17    | 335 | SPCC13B11.01  | 360 | SPCC364.03    | 385 | SPCP1E11.08   |
| 311 | SPBC8E4.01c   | 336 | SPCC1450.04   | 361 | SPCC364.04c   | 386 | SPCP31B10.07  |
| 312 | SPBP23A10.10  | 337 | SPCC1450.05c  | 362 | SPCC364.07    | 387 | SPCP31B10.08c |
| 313 | SPBP23A10.11c | 338 | SPCC1682.09c  | 363 | SPCC417.08    | 388 | SPCPB16A4.03c |
| 314 | SPBP4G3.02    | 339 | SPCC1682.14   | 364 | SPCC4G3.02    | 389 | SPNCRNA.01    |
| 315 | SPBP4H10.13   | 340 | SPCC16C4.12   | 365 | SPCC548.06c   | 390 | SPNCRNA.03    |
| 316 | SPBP4H10.14c  | 341 | SPCC16C4.13c  | 366 | SPCC576.07    | 391 | SPNCRNA.100   |
| 317 | SPBP8B7.02    | 342 | SPCC16C4.19   | 367 | SPCC576.08c   | 392 | SPNCRNA.1015  |
| 318 | SPBP8B7.03c   | 343 | SPCC1739.13   | 368 | SPCC576.10c   | 393 | SPNCRNA.1018  |
| 319 | SPBP8B7.04    | 344 | SPCC1753.03c  | 369 | SPCC576.11    | 394 | SPNCRNA.1032  |
| 320 | SPBP8B7.05c   | 345 | SPCC1795.04c  | 370 | SPCC576.12c   | 395 | SPNCRNA.1042  |
| 321 | SPBP8B7.06    | 346 | SPCC1795.05c  | 371 | SPCC5E4.07    | 396 | SPNCRNA.1055  |
| 322 | SPBP8B7.07c   | 347 | SPCC1795.06   | 372 | SPCC61.01c    | 397 | SPNCRNA.1070  |
| 323 | SPBP8B7.15c   | 348 | SPCC18.13     | 373 | SPCC613.04c   | 398 | SPNCRNA.1072  |
| 324 | SPBP8B7.16c   | 349 | SPCC18.14c    | 374 | SPCC613.05c   | 399 | SPNCRNA.1083  |
| 325 | SPBP8B7.32    | 350 | SPCC1827.03c  | 375 | SPCC613.06    | 400 | SPNCRNA.110   |

| No. | Systematic ID | No. | Systematic ID | No. | Systematic ID | No. | Systematic ID |
|-----|---------------|-----|---------------|-----|---------------|-----|---------------|
| 401 | SPNCRNA.1103  | 426 | SPNCRNA.1464  | 451 | SPNCRNA.1695  | 476 | SPNCRNA.472   |
| 402 | SPNCRNA.113   | 427 | SPNCRNA.1465  | 452 | SPNCRNA.1696  | 477 | SPNCRNA.477   |
| 403 | SPNCRNA.1136  | 428 | SPNCRNA.1471  | 453 | SPNCRNA.1698  | 478 | SPNCRNA.525   |
| 404 | SPNCRNA.1140  | 429 | SPNCRNA.1487  | 454 | SPNCRNA.171   | 479 | SPNCRNA.532   |
| 405 | SPNCRNA.119   | 430 | SPNCRNA.1490  | 455 | SPNCRNA.1710  | 480 | SPNCRNA.579   |
| 406 | SPNCRNA.1197  | 431 | SPNCRNA.1510  | 456 | SPNCRNA.1711  | 481 | SPNCRNA.625   |
| 407 | SPNCRNA.1203  | 432 | SPNCRNA.1511  | 457 | SPNCRNA.1712  | 482 | SPNCRNA.626   |
| 408 | SPNCRNA.1245  | 433 | SPNCRNA.1517  | 458 | SPNCRNA.197   | 483 | SPNCRNA.627   |
| 409 | SPNCRNA.1278  | 434 | SPNCRNA.1524  | 459 | SPNCRNA.219   | 484 | SPNCRNA.628   |
| 410 | SPNCRNA.128   | 435 | SPNCRNA.1545  | 460 | SPNCRNA.242   | 485 | SPNCRNA.639   |
| 411 | SPNCRNA.1309  | 436 | SPNCRNA.1573  | 461 | SPNCRNA.254   | 486 | SPNCRNA.648   |
| 412 | SPNCRNA.132   | 437 | SPNCRNA.1578  | 462 | SPNCRNA.255   | 487 | SPNCRNA.659   |
| 413 | SPNCRNA.1358  | 438 | SPNCRNA.1597  | 463 | SPNCRNA.258   | 488 | SPNCRNA.69    |
| 414 | SPNCRNA.1359  | 439 | SPNCRNA.1598  | 464 | SPNCRNA.265   | 489 | SPNCRNA.717   |
| 415 | SPNCRNA.1375  | 440 | SPNCRNA.1622  | 465 | SPNCRNA.270   | 490 | SPNCRNA.719   |
| 416 | SPNCRNA.1389  | 441 | SPNCRNA.1626  | 466 | SPNCRNA.317   | 491 | SPNCRNA.724   |
| 417 | SPNCRNA.1390  | 442 | SPNCRNA.1627  | 467 | SPNCRNA.358   | 492 | SPNCRNA.743   |
| 418 | SPNCRNA.1397  | 443 | SPNCRNA.163   | 468 | SPNCRNA.399   | 493 | SPNCRNA.756   |
| 419 | SPNCRNA.143   | 444 | SPNCRNA.1643  | 469 | SPNCRNA.400   | 494 | SPNCRNA.770   |
| 420 | SPNCRNA.144   | 445 | SPNCRNA.1651  | 470 | SPNCRNA.403   | 495 | SPNCRNA.781   |
| 421 | SPNCRNA.1443  | 446 | SPNCRNA.1665  | 471 | SPNCRNA.419   | 496 | SPNCRNA.783   |
| 422 | SPNCRNA.1444  | 447 | SPNCRNA.1671  | 472 | SPNCRNA.425   | 497 | SPNCRNA.784   |
| 423 | SPNCRNA.1448  | 448 | SPNCRNA.1672  | 473 | SPNCRNA.445   | 498 | SPNCRNA.806   |
| 424 | SPNCRNA.1457  | 449 | SPNCRNA.1673  | 474 | SPNCRNA.467   | 499 | SPNCRNA.807   |
| 425 | SPNCRNA.1459  | 450 | SPNCRNA.1674  | 475 | SPNCRNA.471   | 500 | SPNCRNA.812   |

| No. | Systematic ID | No. | Systematic ID | No. | Systematic ID |
|-----|---------------|-----|---------------|-----|---------------|
| 501 | SPNCRNA.82    | 526 | SPNCRNA.965   | 551 | SPSNORNA.42   |
| 502 | SPNCRNA.826   | 527 | SPNCRNA.980   | 552 | SPSNORNA.44   |
| 503 | SPNCRNA.831   | 528 | SPNCRNA.989   | 553 | SPSNORNA.45   |
| 504 | SPNCRNA.861   | 529 | SPNCRNA.990   | 554 | SPSNORNA.04   |
| 505 | SPNCRNA.862   | 530 | SPRRNA.26     |     |               |
| 506 | SPNCRNA.863   | 531 | SPRRNA.37     |     |               |
| 507 | SPNCRNA.87    | 532 | SPRRNA.42     |     |               |
| 508 | SPNCRNA.870   | 533 | SPSNORNA.03   |     |               |
| 509 | SPNCRNA.872   | 534 | SPSNORNA.04   |     |               |
| 510 | SPNCRNA.873   | 535 | SPSNORNA.05   |     |               |
| 511 | SPNCRNA.893   | 536 | SPSNORNA.06   |     |               |
| 512 | SPNCRNA.9001  | 537 | SPSNORNA.07   |     |               |
| 513 | SPNCRNA.902   | 538 | SPSNORNA.08   |     |               |
| 514 | SPNCRNA.903   | 539 | SPSNORNA.09   |     |               |
| 515 | SPNCRNA.918   | 540 | SPSNORNA.10   |     |               |
| 516 | SPNCRNA.92    | 541 | SPSNORNA.11   |     |               |
| 517 | SPNCRNA.93    | 542 | SPSNORNA.18   |     |               |
| 518 | SPNCRNA.933   | 543 | SPSNORNA.20   |     |               |
| 519 | SPNCRNA.942   | 544 | SPSNORNA.21   |     |               |
| 520 | SPNCRNA.944   | 545 | SPSNORNA.22   |     |               |
| 521 | SPNCRNA.949   | 546 | SPSNORNA.26   |     |               |
| 522 | SPNCRNA.950   | 547 | SPSNORNA.29   |     |               |
| 523 | SPNCRNA.954   | 548 | SPSNORNA.32   |     |               |
| 524 | SPNCRNA.957   | 549 | SPSNORNA.33   |     |               |
| 525 | SPNCRNA.963   | 550 | SPSNORNA.41   |     |               |

**Supplementary Table S4. Gene ontology showing each cluster**

| GOID       | Term                                         | p-value   | Num_list_Annotation |
|------------|----------------------------------------------|-----------|---------------------|
| GO:0002181 | cytoplasmic translation                      | 7.16E-28  | 130                 |
| GO:0006412 | translation                                  | 3.30E-16  | 132                 |
| GO:0043043 | peptide biosynthetic process                 | 1.22E-15  | 132                 |
| GO:0006518 | peptide metabolic process                    | 6.86E-15  | 133                 |
| GO:0043604 | amide biosynthetic process                   | 3.33E-14  | 135                 |
| GO:0042254 | ribosome biogenesis                          | 1.48E-13  | 86                  |
| GO:0043603 | cellular amide metabolic process             | 1.33E-12  | 138                 |
| GO:0042255 | ribosome assembly                            | 2.41E-11  | 27                  |
| GO:0022613 | ribonucleoprotein complex biogenesis         | 7.48E-10  | 90                  |
| GO:1901566 | organonitrogen compound biosynthetic process | 1.33E-09  | 171                 |
| GO:0000028 | ribosomal small subunit assembly             | 2.55E-08  | 13                  |
| GO:0042273 | ribosomal large subunit biogenesis           | 8.79E-08  | 27                  |
| GO:0000027 | ribosomal large subunit assembly             | 3.68E-06  | 14                  |
| GO:XXXXXXX | unannotated                                  | 8.26E-122 | 145                 |

**Supplementary Table S5. Genes with both repressed transcription and reduced Atf1 binding**

| no. | Systematic ID | ribosome related gene |
|-----|---------------|-----------------------|
| 1   | SPAPB15E9.02c |                       |
| 2   | SPBC14F5.05c  |                       |
| 3   | SPBC27.08c    |                       |
| 4   | SPAC19B12.02c |                       |
| 5   | SPAC926.04c   |                       |
| 6   | SPBP8B7.16c   |                       |
| 7   | SPBC12C2.07c  |                       |
| 8   | SPAC664.06    | ✓                     |
| 9   | SPAC8E11.10   |                       |
| 10  | SPAC19G12.05  |                       |
| 11  | SPAC3H5.05c   | ✓                     |
| 12  | SPBC19G7.04   |                       |
| 13  | SPBP4G3.02    |                       |
| 14  | SPAC1250.05   | ✓                     |
| 15  | SPAC57A10.12c |                       |
| 16  | SPAC1071.10c  |                       |
| 17  | SPBC8E4.01c   |                       |
| 18  | SPCC18.13     |                       |
| 19  | SPBC16C6.12c  | ✓                     |
| 20  | SPCC1183.07   | ✓                     |
| 21  | SPAC140.02    | ✓                     |
| 22  | SPAC11E3.13c  |                       |
| 23  | SPAC110.01    |                       |
| 24  | SPAC890.05    | ✓                     |
| 25  | SPAC10F6.01c  |                       |
| 26  | SPBC1105.05   |                       |
| 27  | SPBC359.03c   |                       |
| 28  | SPCC1739.13   |                       |
| 29  | SPBC26H8.06   |                       |
| 30  | SPAC1F8.07c   |                       |
| 31  | SPAC1039.02   |                       |
| 32  | SPAC110.04c   |                       |
| 33  | SPAC12G12.04  |                       |
| 34  | SPBC30D10.18c | ✓                     |

1. Takemata,N., Oda,A., Yamada,T., Galipon,J., Miyoshi,T., Suzuki,Y., Sugano,S., Hoffman,C.S., Hirota,K. and Ohta,K. (2016) Local potentiation of stress-responsive genes by upstream noncoding transcription. *Nucleic Acids Res.*, **44**, 5174–5189.
2. Asada,R., Takemata,N., Hoffman,C.S., Ohta,K. and Hirota,K. (2015) Antagonistic controls of chromatin and mRNA start site selection by Tup family corepressors and the CCAAT-binding factor. *Mol. Cell. Biol.*, **35**, 847–855.
3. Tashiro,S., Asano,T., Kanoh,J. and Ishikawa,F. (2013) Transcription-induced chromatin association of RNA surveillance factors mediates facultative heterochromatin formation in fission yeast. *Genes Cells*, **18**, 327–339.
4. Hiriart,E., Vavasseur,A., Touat-Todeschini,L., Yamashita,A., Gilquin,B., Lambert,E., Perot,J., Shichino,Y., Nazaret,N., Boyault,C., *et al.* (2012) Mmi1 RNA surveillance machinery directs RNAi complex RITS to specific meiotic genes in fission yeast. *EMBO J.*, **31**, 2296–2308.
